# Supplementary material for: Lasiodiplodia fici sp. nov., Causing Leaf Spot on Ficus altissima in China
Source: MDPI journal article supplement (doi:10.3390/pathogens11080840), 2022-07-27
Supplement: s1 [file s1]

**Supplementary Table S1.** GenBank accession numbers of the isolates included in the phylogenetic analysis.

| Species                      | Isolate number                      | Host                              | GenBank accession number |             |             |
|------------------------------|-------------------------------------|-----------------------------------|--------------------------|-------------|-------------|
|                              |                                     |                                   | ITS                      | <i>tef1</i> | <i>tub2</i> |
| <i>Lasiodiplodia acaciae</i> | <b>CBS 136434*</b>                  | <i>Acacia</i> sp.                 | MT587421                 | MT592133    | MT592613    |
| <i>L. aquilariae</i>         | CGMCC 3.18471*                      | <i>Aquilaria crassna</i>          | KY783442                 | KY848600    | N/A         |
| <i>L.americana</i>           | CERC 1961 = CFCC 50065 *            | <i>Pistachia vera</i>             | KP217059                 | KP217067    | KP217075    |
| <i>L.americana</i>           | CERC 1960 = CFCC 50064              | <i>Pistachia vera</i>             | KP217058                 | KP217066    | KP217074    |
| <i>L.avicenniae</i>          | CMW 41467 *                         | <i>Avocennia marina</i>           | KP860835                 | KP860680    | KP860758    |
| <i>L.avicenniae</i>          | LAS 199                             | <i>Avocennia marina</i>           | KU587957                 | KU587947    | KU587868    |
| <i>L. avicenniarum</i>       | MFLUCC 17-2591*                     | <i>Avicennia marina</i>           | MK347777                 | MK340867    | N/A         |
| <i>L.brasiliense</i>         | CMM 4015 *                          | <i>Mangifera indica</i>           | JX464063                 | JX464049    | N/A         |
| <i>L.brasiliense</i>         | IBL 344                             | <i>Adansonia madagascariensis</i> | KT151808                 | KT151802    | KT151805    |
| <i>L. brasiliensis</i>       | CMM 4469                            | <i>Anacardium occidentale</i>     | KT325574                 | KT325580    | N/A         |
| <i>L.bruguierae</i>          | CMW 41470*                          | <i>Bruguiera gymnorrhiza</i>      | KP860833                 | KP860678    | KP860756    |
| <i>L.bruguierae</i>          | CMW 41614                           | <i>Bruguiera gymnorrhiza</i>      | KP860834                 | KP860679    | KP860757    |
| <i>L. caatinguensis</i>      | CMM 1325                            | <i>Citrus sinensis</i>            | KT154760                 | KT008006    | KT154767    |
| <i>L. chiangraiensis</i>     | MFLUCC 21-0003*                     | Unknown host                      | MW760854                 | MW815630    | MW815628    |
| <i>L. chiangraiensis</i>     | GZCC 21-0003                        | Unknown host                      | MW760853                 | MW815629    | MW815627    |
| <i>L. chinensis</i>          | CGMCC 3.18061                       | Woody branch                      | KX499889                 | KX499927    | KX500002    |
| <i>L. chonburiensis</i>      | MFLUCC 16-0376*                     | <i>Pandanus</i> sp.               | MH275066                 | MH412773    | MH412742    |
| <i>L.cinnamomi</i>           | CFCC 51997 *                        | <i>Cinnamomum camphora</i>        | MG866028                 | MH236799    | MH236797    |
| <i>L.cinnamomi</i>           | CFCC 51998                          | <i>Cinnamomum camphora</i>        | MG866029                 | MH236800    | MH236798    |
| <i>L.citricola</i>           | CBS 124707 = IRAN 1522C *           | <i>Citrus</i> sp.                 | GU945354                 | GU945340    | KP872405    |
| <i>L.citricola</i>           | CBS124706 = IRAN 1521C              | <i>Citrus</i> sp.                 | GU945353                 | GU945339    | KP872406    |
| <i>L. crassispora</i>        | CMW 13488                           | <i>Eucalyptus urophylla</i>       | DQ103552                 | DQ103559    | KU887507    |
| <i>L.crassispora</i>         | CBS 118741 = WAC12533 *             | <i>Santalum album</i>             | DQ103550                 | EU673303    | KU887506    |
| <i>L.crassispora</i>         | CMM 4585                            | –                                 | MG954354                 | MG979520    | MG979552    |
| <i>L. euphorbiaceicola</i>   | CMW 33268                           | <i>Adansonia</i>                  | KU887131                 | KU887008    | KU887430    |
| <i>L.euphorbicola</i>        | CMM 3609 *                          | <i>Jatropha curcas</i>            | KF234543                 | KF226689    | KF254926    |
| <i>L.euphorbicola</i>        | CMW 33350                           | <i>Adansonia digitata</i>         | KU887149                 | KU887026    | KU887455    |
| <i>L. exigua</i>             | CBS 137785                          | <i>Quercus ilex</i>               | KJ638317                 | KJ638336    | KU887509    |
| <i>L. fici</i>               | ZHKUCC 21-0125*                     | <i>Ficus altissima</i>            | ON178662                 | ON599008    | ON599011    |
| <i>L. fici</i>               | ZHKUCC 21-0126                      | <i>Ficus altissima</i>            | ON178664                 | ON599007    | ON599010    |
| <i>L. fici</i>               | ZHKUCC 21-0127                      | <i>Ficus altissima</i>            | ON178663                 | ON599006    | ON599009    |
| <i>L. gilanensis</i>         | CBS 124704*                         | <i>Citrus</i> sp.                 | GU945351                 | GU945342    | KU887511    |
| <i>L.gilanensis</i>          | CBS 124704 = IRAN1523C= UCCE 940B * | <i>Citrus</i> sp.                 | KX906851                 | KX906853    | KX906849    |
| <i>L.gilanensis</i>          | CBS 124705 = IRAN 1501C             | <i>Citrus</i> sp.                 | GU945352                 | GU945341    | KP872412    |
| <i>L. gonubiensis</i>        | CMW 14078                           | <i>Syzygium cordatum</i>          | AY639594                 | DQ103567    | EU673126    |
| <i>L.gonubiensis</i>         | CBS 115812 = CMW 14077 *            | <i>Syzygium cordatum</i>          | AY639595                 | DQ103566    | DQ458860    |

|                            |                                      |                              |          |          |          |
|----------------------------|--------------------------------------|------------------------------|----------|----------|----------|
| <i>L.gonubiensis</i>       | CMW 46621 = MTU 56                   | <i>Syzygium cordatum</i>     | KY052944 | KY024623 | KY000126 |
| <i>L.gravistriata</i>      | CMM 4564 *                           | <i>Anacardium humile</i>     | KT250949 | KT250950 | N/A      |
| <i>L.gravistriata</i>      | CMM 4565                             | <i>Anacardium humile</i>     | KT250947 | KT266812 | N/A      |
| <i>L.hormozganensis</i>    | CBS 124709 = IRAN 1500C *            | <i>Olea</i> sp.              | GU945355 | GU945343 | KP872413 |
| <i>L.hormozganensis</i>    | CBS 124708 = IRAN 1498C              | <i>Mangifera indica</i>      | GU945356 | GU945344 | KP872414 |
| <i>L. hyalina</i>          | CGMCC 3.17975                        | <i>Acacia confusa</i>        | KX499879 | KX499917 | KX499992 |
| <i>L.indica</i>            | IBP 1 *                              | <i>Angiospermous tree</i>    | KM376151 | N/A      | N/A      |
| <i>L.iranensis</i>         | CBS 124710 = IRAN 1520C *            | <i>Salvadora persica</i>     | GU945348 | GU945336 | KU887516 |
| <i>L.iranensis</i>         | CBS 124711 = IRAN 1502C = CMM 4603   | <i>Juglans</i> sp.           | GU945347 | GU945335 | MG979537 |
| <i>L. jatrophiicola</i>    | CMM 3610                             | <i>Jatropha curcas</i>       | KF234544 | KF226690 | KF254927 |
| <i>L. krabiensis</i>       | MFLUCC 17-2617*                      | <i>Bruguiera</i> sp.         | MN047093 | MN077070 | N/A      |
| <i>L. laeliocattleiae</i>  | CBS 130992*                          | <i>Mangifera indica</i>      | KU507487 | KU507454 | KU887508 |
| <i>L. laeliocattleiae</i>  | BOT 29                               | <i>Mangifera indica</i>      | JN814401 | JN814428 | N/A      |
| <i>L. laeliocattleiae</i>  | CMM 4724                             | <i>Vitis vinifera</i>        | MG954343 | MG979508 | MG979541 |
| <i>L.lignicola</i>         | CBS 134112= MFLUCC 11-0435 *         | Dead wood                    | JX646797 | KU887003 | KT852958 |
| <i>L.macrospora</i>        | CMM 3833 *                           | <i>Jatropha curcas</i>       | KF234557 | KF226718 | KF254941 |
| <i>L.mahajangana</i>       | CBS 124925 = CMW 27801 *             | <i>Terminalia catappa</i>    | FJ900595 | FJ900641 | FJ900630 |
| <i>L.mahajangana</i>       | CMW 27818                            | <i>Terminalia catappa</i>    | FJ900596 | FJ900642 | FJ900631 |
| <i>L.margaritacea</i>      | CBS 122519 = CMW 26162 *             | <i>Adansonia gibbosa</i>     | EU144050 | EU144065 | KX464903 |
| <i>L.mediterranea</i>      | CBS 122065                           | <i>Adansonia gibbosa</i>     | EU144051 | EU144066 | N/A      |
| <i>L.mediterranea</i>      | CBS 137783 *                         | <i>Holm oak</i>              | KJ638312 | KJ638331 | KU887521 |
| <i>L.mediterranea</i>      | CBS137784                            | <i>Grapevine</i>             | KJ638311 | KJ638330 | KU887522 |
| <i>L.microconidia</i>      | CGMCC 3.18485 *                      | <i>Aquilaria crassna</i>     | KY783441 | KY848614 | N/A      |
| <i>L. missouriana</i>      | CBS 128311                           | <i>Vitis vinifera</i>        | HQ288225 | HQ288267 | HQ288304 |
| <i>L. parva</i>            | CBS 456.78 *                         | Cassava-field soil           | EF622083 | EF622063 | KU887523 |
| <i>L. parva</i>            | CBS 494.78                           | Cassava-field soil           | EF622084 | EF622064 | EU673114 |
| <i>L.plurivora</i>         | CBS 120832 = STE-U5803 *             | <i>Prunus salicina</i>       | EF445362 | EF445395 | KP872421 |
| <i>L.plurivora</i>         | CBS 121103 = STE-U4583               | <i>Vitis vinifera</i>        | AY343482 | EF445396 | KP872422 |
| <i>L.pontae</i>            | CMW 1277 = IBL12 *                   | <i>Spondias purpurea</i>     | KT151794 | KT151791 | KT151797 |
| <i>L. pseudotheobromae</i> | CBS 116460                           | <i>Acacia mangium</i>        | EF622078 | EF622058 | KU198428 |
| <i>L.pseudotheobromae</i>  | CBS 116459 *                         | <i>Gmelina arborea</i>       | EF622077 | EF622057 | EU673111 |
| <i>L. pseudotheobromae</i> | CMM 3887                             | <i>Jatropha curcas</i>       | KF234559 | KF226722 | KF254943 |
| <i>L. pyriformis</i>       | CBS 121770                           | <i>Acacia mellifera</i>      | EU101307 | EU101352 | KU887527 |
| <i>L.rubropurpurea</i>     | CBS 118740 = CMW 14700 = WAC 12535 * | <i>Eucalyptus grandis</i>    | DQ103553 | DQ103571 | KU887529 |
| <i>L.rubropurpurea</i>     | WAC 12536 = CMW 15207                | <i>Eucalyptus grandis</i>    | DQ103554 | DQ103572 | KP872425 |
| <i>L.subglobosa</i>        | CMM 3872 *                           | <i>Jatropha curcas</i>       | KF234558 | KF226721 | KF254942 |
| <i>L.subglobosa</i>        | CMM 4046                             | <i>Jatropha curcas</i>       | KF234560 | KF226723 | KF254944 |
| <i>L. swieteniae</i>       | MFLUCC 18-0244                       | <i>Swietenia mahagoni</i>    | MK347789 | MK340870 | MK412877 |
| <i>L. syzygii</i>          | GUCC 9719.1*                         | <i>Wax apple</i>             | MT990531 | MW016943 | MW014331 |
| <i>L. syzygii</i>          | GUCC 9719.3                          | <i>Syzygium samarangense</i> | MW081992 | MW087102 | MW087105 |
| <i>L. thailandica</i>      | CBS 138760*                          | <i>Mangifera indica</i>      | KJ193637 | KJ193681 | N/A      |

|                         |                                      |                              |          |          |          |
|-------------------------|--------------------------------------|------------------------------|----------|----------|----------|
| <i>L. thailandica</i>   | CBS 138653                           | <i>Phyllanthus acidus</i>    | KM006433 | KM006464 | N/A      |
| <i>L. thailandica</i>   | BJFU DZP160123-13                    | <i>Albizia chinensis</i>     | KY676789 | KY676798 | KY751301 |
| <i>L. theobromae</i>    | CBS 164.96 *                         | Fruit along caral reef coast | AY640255 | AY640258 | KU887532 |
| <i>L. theobromae</i>    | CBS 111530                           | <i>Leucospermum</i> sp.      | EF622074 | EF622054 | KU887531 |
| <i>L. theobromae</i>    | CBS 124.13                           | –                            | DQ458890 | DQ458875 | DQ458858 |
| <i>L. tropica</i>       | CGMCC 3.18477*                       | <i>Aquilaria crassna</i>     | KY783454 | KY848616 | KY848540 |
| <i>L. venezuelensis</i> | WAC 12540                            | <i>Acacia mangium</i>        | DQ103548 | DQ103569 | KU887534 |
| <i>L. venezuelensis</i> | CBS 118739 = CMW 13511 = WAC 12539 * | <i>Acacia mangium</i>        | DQ103547 | EU673305 | KU887533 |
| <i>L. venezuelensis</i> | CBS 129757                           | <i>Acacia mangium</i>        | JX545102 | JX545122 | JX545142 |
| <i>L. viticola</i>      | CBS 128313 = UCD 2553AR *            | <i>Vitis vinifera</i>        | HQ288227 | HQ288269 | HQ288306 |
| <i>L. viticola</i>      | CBS 128315 = UCD 2604MO              | <i>Vitis vinifera</i>        | HQ288228 | HQ288270 | HQ288307 |
| <i>L. vitis</i>         | CBS 124060*                          | <i>Vitis vinifera</i>        | KX464148 | KX464642 | KX464917 |
| <i>Diplodia mutila</i>  | CMW 7060                             | <i>Fraxinus excelsior</i>    | AY236955 | AY236904 | AY236933 |
| <i>D. seriata</i>       | CBS 112555*                          | <i>Vitis vinifera</i>        | AY259094 | AY573220 | DQ458856 |

\* Indicates ex-type/ex-epitype isolates. The new species is indicated in bold. Abbreviations of isolates and culture collections: BOT—Personal number of S. Denman; CBS—Centraalbureau voor Schimmelcultures, Utrecht, Netherlands; CFCC—China Forestry Culture Collection Center, Beijing, China; CGMCC—China General Microbiological Culture Collection Center; CMM—Culture Collection of Phytopathogenic Fungi “Prof. Maria Menezes”, Universidade Federal Rural de Pernambuco, Recife, Brazil; CMW—Culture collection of the Forestry and Agricultural Biotechnology Institute (FABI) of the University of Pretoria, Pretoria South Africa; GZCC—Guizhou Culture Collection, Guiyang, China; MFLUCC—Mae Fah Luang University Culture Collection, Chiang Rai, Thailand; STE-U—Culture Collection of the Department of Plant Pathology, University of Stellenbosch, South Africa; UCD—University of California, Davis, Plant Pathology Department Culture Collection; WAC—Department of Agriculture Western Australia Plant-Pathogen Collection, Perth, Australia. Sequences produced in this study are shown in red. \* ex-type or ex-epitype culture.
